# Supplementary material for: Tissue Distribution of Oleocanthal and Its Metabolites after Oral Ingestion in Rats
Source: MDPI journal article supplement (doi:10.3390/antiox10050688), 2021-04-27
Supplement: s1 [file s1]

**Table S1.** Identification of OLC and its metabolites in plasma and tissues through LTQ-Orbitrap-MS.

| Metabolite description                           | Elemental composition<br>[M - H]                | RT (min) | Observed [M - H] | Exact mass | Mass error (ppm) | Major fragments |
|--------------------------------------------------|-------------------------------------------------|----------|------------------|------------|------------------|-----------------|
| OLC                                              | C <sub>17</sub> H <sub>19</sub> O <sub>5</sub>  | 7.26     | 303.1237         | 303.1227   | 1                | 285/179         |
| Tyrosol                                          | C <sub>8</sub> H <sub>9</sub> O <sub>2</sub>    | 4.55     | 137.0606         | 137.0597   | 0.894            | 93              |
| OLC + H <sub>2</sub>                             | C <sub>17</sub> H <sub>21</sub> O <sub>5</sub>  | 7.97     | 305.1403         | 305.1383   | 0.05             | 174/205         |
| OLC + OH                                         | C <sub>17</sub> H <sub>19</sub> O <sub>6</sub>  | 6.81     | 319.1184         | 319.1176   | 0.785            | 153/183         |
| OLC + OH + H <sub>2</sub> O                      | C <sub>17</sub> H <sub>21</sub> O <sub>7</sub>  | 7.05     | 337.1314         | 337.1281   | 3.221            | 295/201         |
| OLC + H <sub>2</sub> O                           | C <sub>17</sub> H <sub>21</sub> O <sub>6</sub>  | 6.76     | 321.1337         | 321.1332   | 0.435            | 201/183         |
| OLC + OH + CH <sub>3</sub>                       | C <sub>18</sub> H <sub>21</sub> O <sub>6</sub>  | 8.96     | 333.1347         | 333.1332   | 0.835            | 165/183         |
| OLC + H <sub>2</sub> O + CH <sub>3</sub>         | C <sub>18</sub> H <sub>23</sub> O <sub>6</sub>  | 7.31     | 335.1492         | 335.1489   | 0.285            | 151/201         |
| OLC + OH + Glucu                                 | C <sub>23</sub> H <sub>27</sub> O <sub>12</sub> | 9.62     | 495.1502         | 495.1497   | 0.458            | 197             |
| OLC + H <sub>2</sub> O + Glucu                   | C <sub>23</sub> H <sub>29</sub> O <sub>12</sub> | 6.47     | 497.1663         | 497.1653   | 0.947            | 321/201         |
| OLC + H <sub>2</sub> O + CH <sub>3</sub> + Glucu | C <sub>24</sub> H <sub>31</sub> O <sub>13</sub> | 6.57     | 527.1801         | 527.1759   | 4.1974           | 351/183         |

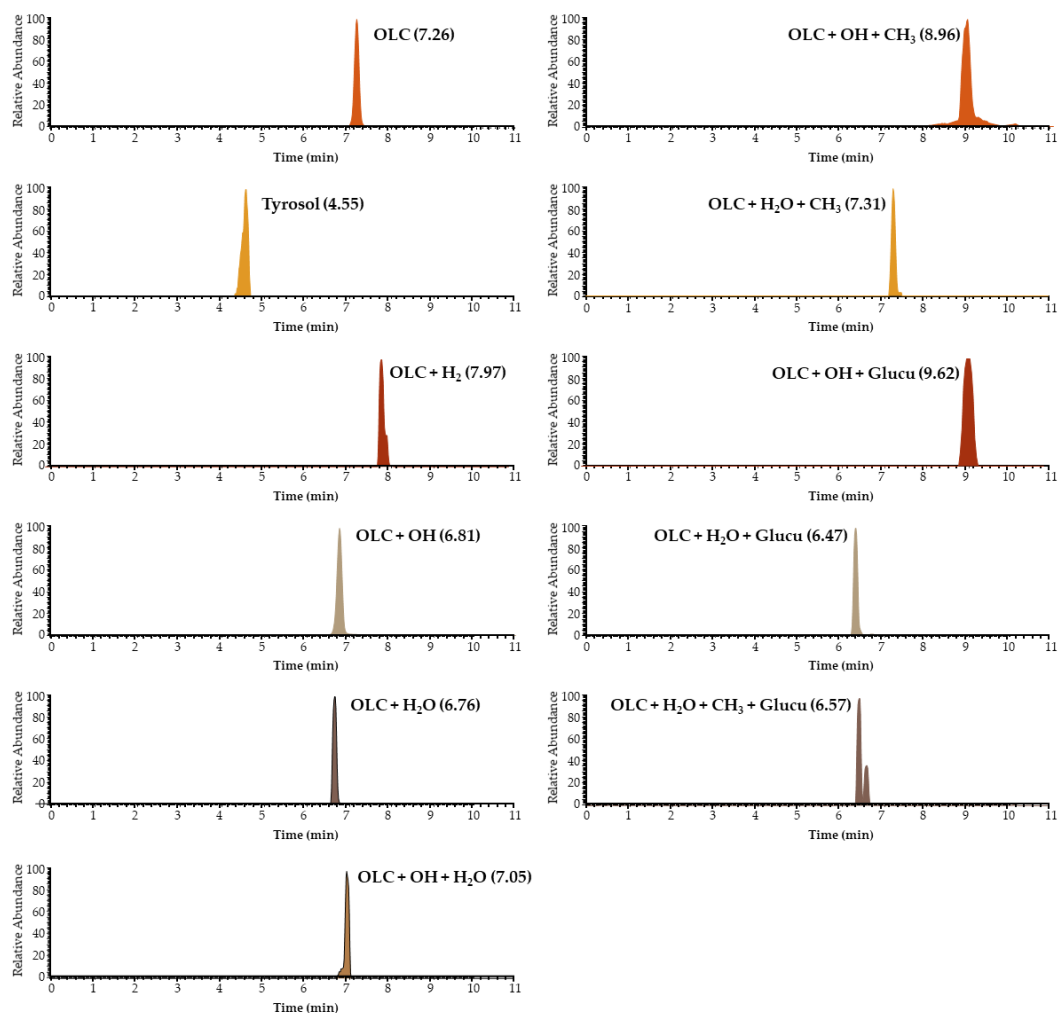

**Figure S1.** Extracted ion chromatograms of the OLC and its identified metabolites in different tissues.
